# Supplementary material for: A20 and the noncanonical NF-κB pathway are key regulators of neutrophil recruitment during fetal ontogeny
Source: JCI journal article supplement (doi:10.1172/jci.insight.155968), 2023-01-12
Supplement: sd1 [file 1]

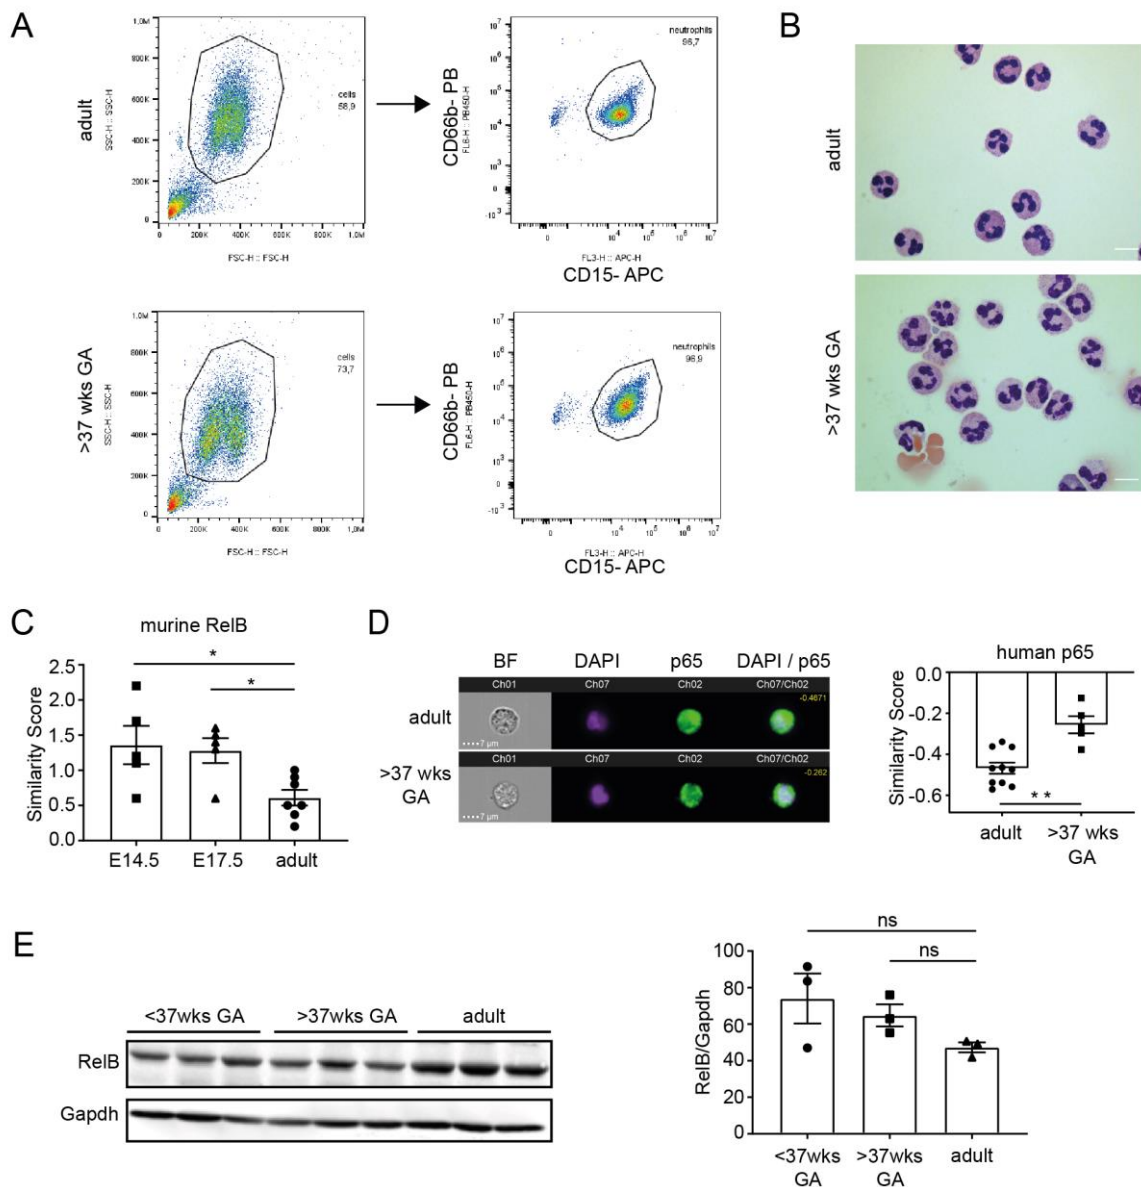

**Supplemental Figure 1: Comparison of human adult and fetal neutrophils, RelB and p65 localization as well as RelB protein expression levels.**

(A) Representative forward scatter vs. side scatter dot plots of isolated human adult and fetal (gestational age >37 weeks) neutrophils (left panels). Gating of human neutrophils was performed using CD15 and CD66b (right panels). Cytoflex S flow cytometer was used and data was analyzed with the FlowJo Analysis Software. (B) Representative images of May-Gruenwald Giemsa stained cytopsin slides of isolated human adult and fetal (gestational age >37 weeks) neutrophils. Images were obtained using a Leica DM2500 microscope equipped with a DMC2900 CMOS camera and a HCX PL APO 100x/1.40 Oil Ph3. Scale bar: 10 $\mu$ m (C) Imaging flow cytometry was performed on murine adult and E14.5 and E17.5 fetal neutrophils and nuclear RelB was quantified. Similarity score defines overlap of nuclear DAPI signal and the respective NF- $\kappa$ B subunit. All data is presented as mean  $\pm$  SEM. (\*  $p < 0.05$ ,  $n = 5-7$ ) Ordinary one-way ANOVA with Tukey's multiple comparisons test. (D) Imaging flow cytometry was performed on cord blood neutrophils from mature infants (gestational age >37 weeks) and peripheral blood from adult healthy donors. Nuclear signal was determined by DAPI and additionally the NF- $\kappa$ B subunit p65 was visualized. Representative pictures of fetal and adult neutrophils are shown as brightfield (BF) image, DAPI, NF- $\kappa$ B subunit p65 and a DAPI/p65 overlay. Respective similarity scores are displayed. Scale bar: 7 $\mu$ m. Similarity score defines overlap of nuclear DAPI signal and the respective

NF- $\kappa$ B subunit. All data is presented as mean  $\pm$  SEM (\*\*  $p < 0.005$ ,  $n = 5-10$ ). Mann Whitney test. (E) Western blot and respective quantitative analysis of RelB in neutrophils isolated from premature (gestational age (GA)  $< 37$  weeks) and mature infants (gestational age  $> 37$  weeks) and peripheral blood from healthy adult donors. Band intensity was normalized to Gapdh. All data is presented as mean  $\pm$  SEM. (ns= not significant;  $n = 3$ ); Ordinary one-way ANOVA with Dunnett's multiple comparisons test.

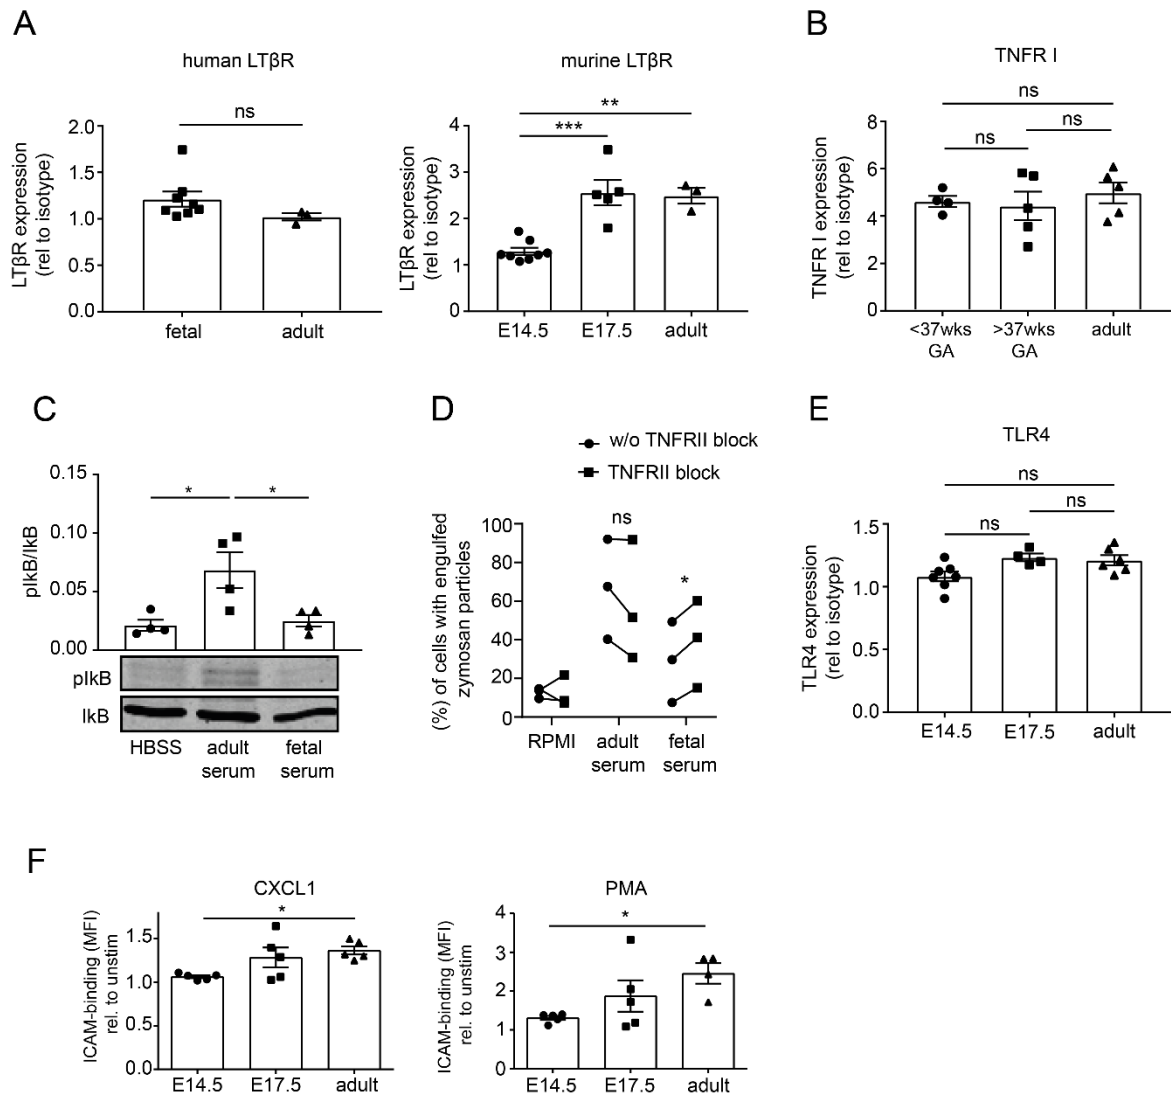

**Supplemental Figure 2: Surface marker levels in fetal and adult neutrophils, stimulation of fetal neutrophils with adult and fetal serum as well as ICAM-1 binding assay**

(A) Flow cytometry analysis of LTβR expression on human and murine neutrophils out of whole blood from indicated gestational ages. Median fluorescence intensity normalized to isotype control is displayed. All data is presented as mean ± SEM. (ns= not significant, \*\* p<0.005, \*\*\* p<0.001; n= 6).

(B) Flow cytometry analysis of TNFR I expression on human neutrophils out of whole blood from indicated gestational ages. Median fluorescence intensity normalized to isotype control is displayed. All data is presented as mean ± SEM. (ns= not significant; n= 4-5/group). Ordinary one-way ANOVA with Dunnett's multiple comparisons test.

(C) Western blot and respective quantitative analysis of phospho-IκB in fetal neutrophils after HBSS (control) incubation or stimulation with adult or fetal serum. Band intensities were normalized to total IκB protein. All data is presented as mean ± SEM. (\* p<0.05; n= 4) Ordinary one-way ANOVA with Tukey's multiple comparisons test.

(D) Quantitative analysis of phagocytosis of human adult neutrophils by measuring the amount of engulfed zymosan particles by flow cytometry after incubation with either RPMI (w/o TNFRII block) or blocking with anti-human TNFRII antibody (TNFRII block) for 2 h prior to stimulation without (RPMI) or with adult or fetal serum. All data is presented as mean ± SEM. (ns= not significant, \* p<0.05; n= 3) Paired student's t-test for each group (RPMI, adult serum and fetal serum).

(E) Flow cytometry analysis of

the LPS receptor TLR4 expression on the cell surface of fetal and adult mouse neutrophils. Median expression levels relative to the respective isotype control are displayed. All data is presented as mean  $\pm$  SEM. (ns = not significant; n=4-7). Ordinary one-way ANOVA with Dunnett's multiple comparisons test. (F) Soluble ICAM-1 binding to LFA-1 on murine neutrophils was investigated in vitro. Values of ICAM-1 binding to unstimulated control cells was set to one and results are shown relative to unstimulated controls. Data are presented as mean +SEM (\*  $p < 0.05$ , n=5-7). Ordinary one-way ANOVA with Tukey's multiple comparisons test.

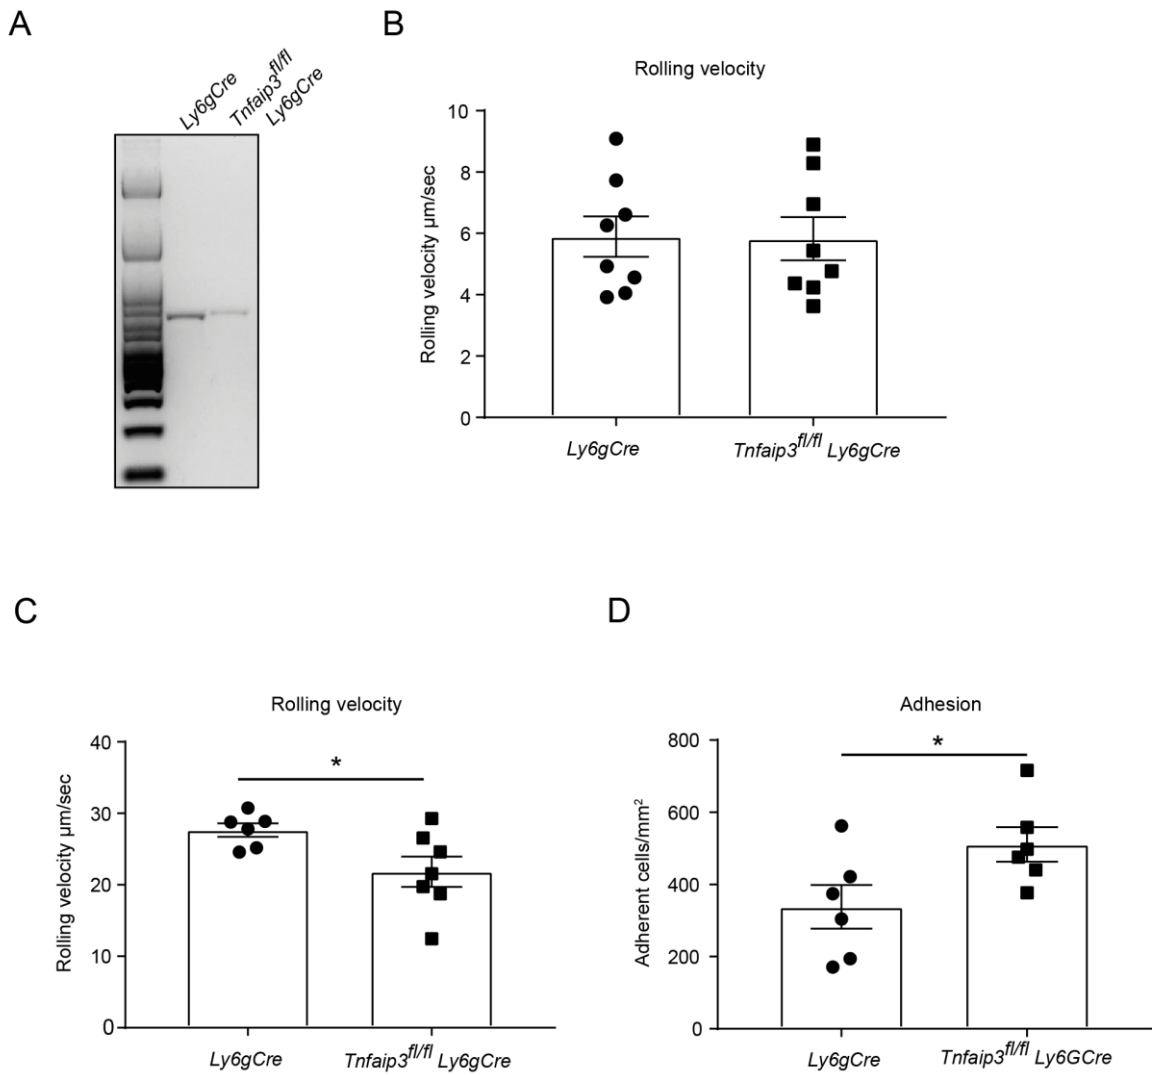

**Supplemental Figure 3: Neutrophil adhesion in *Tnfaip3<sup>fl/fl</sup> Ly6gCre* mice.**

(A) Representative images of A20 mRNA levels in *Ly6gCre* and *Tnfaip3<sup>fl/fl</sup> Ly6gCre* isolated neutrophils. (B) In vivo leukocyte rolling velocity was analyzed in 2h TNF- $\alpha$  -stimulated venules of mouse cremaster muscles in 8 *Ly6gCre* and 8 *Tnfaip3<sup>fl/fl</sup> Ly6gCre* mice. (C) In vivo leukocyte rolling velocity and (D) leukocyte adhesion was analyzed in surgically prepared venules of mouse cremaster muscles in 6 *Ly6gCre* and 6 *Tnfaip3<sup>fl/fl</sup> Ly6gCre* mice. Values are given as mean  $\pm$  SEM; \*  $p < 0.05$ . Unpaired student's t-test.

**Supplemental Movie 1 and 2: In vivo imaging of E14.5 and E17.5 yolk sac vessels after LPS stimulation**

Adhesion of fetal neutrophils at E14.5 (Movie 1) and E17.5 (Movie 2) in yolk sac vessels in vivo was assessed 2h after *Lyz2<sup>GFP</sup>* mice received an intrauterine injection of 100ng LPS. Using fluorescence microscopy vessels were recorded for approximately 1 minute and neutrophils identified due to their GFP signal. Movies were analyzed using Fiji software. Scale bar: 30µm.

**Supplemental Movie 3: In vivo imaging of inflamed cremaster muscle venules of *Tnfaip3<sup>fl/fl</sup>* *Ly6gCre* and *Ly6gCre* mice**

In vivo leukocyte rolling and adhesion was analyzed in 2h TNF-α-stimulated venules of mouse cremaster muscles. Each vessel was recorded for approximately 1 min using BX51WI microscope with a water immersion objective ×40, 0.80 NA and a Olympus CCD camera (CF8/1, Kappa). Movies were analyzed using Fiji software. Scale bar: 30µm.

**Supplemental Table 1: Candidate genes according to their function and association with biological processes**

WEB-based Gene Set Analysis Toolkit (WebGestalt) was applied, to group candidate genes according to their function and association with biological processes.

**Supplemental Table 2: Overrepresentation of RelB subunit in promoters of upregulated genes**

| Subunit | Regulation | P-value    | Odds ratio | Not regulated |       | Regulated |       |
|---------|------------|------------|------------|---------------|-------|-----------|-------|
|         |            |            |            | not bound     | bound | not bound | bound |
| p65     | down       | 0.00026281 | 2.82844308 | 4462          | 4042  | 16        | 41    |
| RelB    | down       | 5.19E-07   | 4.05754114 | 5383          | 3121  | 17        | 40    |
| p50     | down       | 5.72E-06   | 3.6366211  | 7087          | 1417  | 33        | 24    |
| p52     | down       | 0.00052564 | 2.54197721 | 5789          | 2715  | 26        | 31    |
| p65     | up         | 0.28319133 | 0.75556444 | 4436          | 4054  | 42        | 29    |
| RelB    | up         | 1          | 0.98692307 | 5355          | 3135  | 45        | 26    |
| p50     | up         | 0.00975615 | 0.29304986 | 7053          | 1437  | 67        | 4     |
| p52     | up         | 0.37327176 | 0.77222254 | 5763          | 2727  | 52        | 19    |

**Supplemental Table 3: Table of RelB- up- and downregulated genes in cord blood neutrophils in comparison to adult neutrophils.**

| Upregulated in cord blood neutrophils |                                                                |
|---------------------------------------|----------------------------------------------------------------|
| Gene symbol                           | Gene name                                                      |
| JAG1                                  | jagged 1                                                       |
| ALDH2                                 | aldehyde dehydrogenase 2 family (mitochondrial)                |
| ARG1                                  | arginase 1                                                     |
| ENO1                                  | enolase 1, (alpha)                                             |
| HES1                                  | hairy and enhancer of split 1, (Drosophila)                    |
| IGF1R                                 | insulin-like growth factor 1 receptor                          |
| IL6ST                                 | interleukin 6 signal transducer (gp130, oncostatin M receptor) |
| IL10RA                                | interleukin 10 receptor, alpha                                 |
| LDLR                                  | low density lipoprotein receptor                               |
| MAK                                   | male germ cell-associated kinase                               |
| NFE2L2                                | nuclear factor, erythroid 2-like 2                             |

|         |                                                                                  |
|---------|----------------------------------------------------------------------------------|
| P4HA1   | prolyl 4-hydroxylase, alpha polypeptide I                                        |
| PPP1CB  | protein phosphatase 1, catalytic subunit, beta isozyme                           |
| PTPN7   | protein tyrosine phosphatase, non-receptor type 7                                |
| RALGDS  | ral guanine nucleotide dissociation stimulator                                   |
| SKIL    | SKI-like oncogene                                                                |
| SLC8A1  | solute carrier family 8 (sodium/calcium exchanger), member 1                     |
| TFRC    | transferrin receptor (p90, CD71)                                                 |
| KLF10   | Kruppel-like factor 10                                                           |
| TNFAIP3 | tumor necrosis factor, alpha-induced protein 3                                   |
| UPP1    | uridine phosphorylase 1                                                          |
| EZR     | Ezrin                                                                            |
| IL1R2   | interleukin 1 receptor, type II                                                  |
| SLC7A5  | solute carrier family 7 (amino acid transporter light chain, L system), member 5 |
| GAS7    | growth arrest-specific 7                                                         |
| DGKD    | diacylglycerol kinase, delta 130kDa                                              |
| BHLHE40 | basic helix-loop-helix family, member e40                                        |
| COX7A2L | cytochrome c oxidase subunit VIIa polypeptide 2 like                             |
| SF3A3   | splicing factor 3a, subunit 3, 60kDa                                             |
| IRAK3   | interleukin-1 receptor-associated kinase 3                                       |
| ELL2    | elongation factor, RNA polymerase II, 2                                          |
| ZNF292  | zinc finger protein 292                                                          |
| CLIC4   | chloride intracellular channel 4                                                 |
| TIAM2   | T-cell lymphoma invasion and metastasis 2                                        |
| RABGEF1 | RAB guanine nucleotide exchange factor (GEF) 1                                   |
| PAG1    | phosphoprotein associated with glycosphingolipid microdomains 1                  |
| SAMSN1  | SAM domain, SH3 domain and nuclear localization signals 1                        |
| RILPL2  | Rab interacting lysosomal protein-like 2                                         |
| IRF2BP2 | interferon regulatory factor 2 binding protein 2                                 |
| PIM3    | pim-3 oncogene                                                                   |

| <b>Downregulated in cord blood neutrophils</b> |                                                                       |
|------------------------------------------------|-----------------------------------------------------------------------|
| <b>Gene symbol</b>                             | <b>Gene name</b>                                                      |
| RHOB                                           | ras homolog family member B                                           |
| ATP6VOA1                                       | ATPase H <sup>+</sup> transporting VO subunit a1                      |
| CALM3                                          | calmodulin 3                                                          |
| GBP1                                           | guanylate binding protein 1                                           |
| NFIC                                           | nuclear factor I C                                                    |
| EIF3H                                          | eukaryotic translation initiation factor 3 subunit Hrabaptin, RAB GTP |
| RABEP1                                         | rabaptin, RAB GTPase binding effector protein 1                       |
| MED27                                          | mediator complex subunit 27                                           |
| VTI1B                                          | vesicle transport through interaction with t-SNAREs 1B                |
| TCFL5                                          | transcription factor like 5                                           |
| SP140                                          | SP140 nuclear body protein                                            |
| ZFYVE26                                        | zinc finger FYVE-type containing 26                                   |

|         |                                                    |
|---------|----------------------------------------------------|
| CCDC28A | coiled-coil domain containig 28A                   |
| P2RY10  | P2Y receptor family member 10                      |
| BAZ2B   | bromodomain adjacent to zinc finger domain 2B      |
| TAPBPL  | TAP binding protein like                           |
| C7orf43 | chromosome 7 open reading frame 43                 |
| NAGK    | N-acetylglucosamine kinase                         |
| PNRC2   | proline rich nuclear receptor coactivator 2        |
| PRRG4   | proline rich and Gla domain 4                      |
| ASCC2   | activating signal cointegrator 1 complex subunit 2 |
| RAVER1  | ribonucleoprotein, PTB binding 1                   |
| RPP25L  | ribonuclease P/MRP subunit p25 like                |
| MICA    | MHC class I polypeptide-related sequence A         |

## Supplemental Methods

### Soluble ICAM-1 binding assay

Isolated murine neutrophils were resuspended in HBSS Buffer and stimulated with 100ng/ml rmCXCL1 (PeproTech), PMA (Calbiochem) or an equal amount of HBSS buffer in the presence of soluble rmICAM-1 (ICAM-1 hFC chimera; R&D Systems, 20µg/ml), goat anti-human Fcg-biotin (eBioscience) and streptavidin-PerCP-Cy5.5 (eBioscience) for 3 minutes at 37°C. Cells were fixed (FACS Lysing Solution; BD), stained with rat anti-mouse Ly6G-Pacific Blue antibody (1A8; BioLegend) and measured using a flow cytometer.
